# Supplementary material for: Retinal microglia are critical for subretinal neovascular formation
Source: JCI journal article supplement (doi:10.1172/jci.insight.137317), 2020-05-21
Supplement: sd1 [file 1]

You are being redirected.
